# Supplementary material for: Impact of Statin Treatment Intensity after Endovascular Revascularization on Lower Extremity Peripheral Artery Disease
Source: PubMed Central journal article supplement — Yonsei Med J. 2022 Mar 18;63(4):333–41. doi: 10.3349/ymj.2022.63.4.333 (PMC8965427; doi:10.3349/ymj.2022.63.4.333), 2022-03-18
Supplement: ymj-63-333-s001.pdf [file ymj-63-333-s001.pdf]

**Supplementary Table 1.** Baseline Characteristics of the Study Population according to the Intensity of Statin Therapy after Propensity Score Matching

| Variables                            | LMI (n=238) | HI (n=79)  | p value | SD    | LMI (n=225) | HI (n=227) | p value | SD    |
|--------------------------------------|-------------|------------|---------|-------|-------------|------------|---------|-------|
| Age (yr)                             | 71±10       | 68±11      | 0.088   | 2.13  | 71±10       | 71±19      | 0.088   | 0.35  |
| Male                                 | 175 (73.5)  | 64 (81.0)  | 0.181   | 0.08  | 164 (72.9)  | 170 (74.8) | 0.644   | 0.09  |
| Current smoker                       | 79 (33.2)   | 32 (40.5)  | 0.238   | 0.04  | 73 (32.4)   | 81 (35.6)  | 0.473   | 0.02  |
| Critical limb ischemia               | 89 (37.4)   | 23 (29.1)  | 0.182   | -0.08 | 86 (38.2)   | 96 (42.4)  | 0.371   | 0     |
| Hypertension                         | 187 (78.6)  | 52 (65.8)  | 0.023   | -0.01 | 178 (79.1)  | 168 (74.2) | 0.217   | -0.12 |
| Diabetes                             | 128 (53.8)  | 36 (45.6)  | 0.206   | -0.07 | 123 (54.7)  | 127 (55.9) | 0.795   | -0.06 |
| Dyslipidemia                         | 23 (9.7)    | 6 (7.6)    | 0.580   | -0.02 | 23 (10.2)   | 22 (9.5)   | 0.791   | 0     |
| Congestive heart failure             | 31 (13.0)   | 7 (8.9)    | 0.323   | -0.05 | 30 (13.3)   | 25 (11.0)  | 0.455   | 0.01  |
| Chronic kidney disease               | 66 (27.7)   | 21 (26.6)  | 0.843   | 0.01  | 62 (27.6)   | 66 (29.1)  | 0.719   | -0.03 |
| Coronary artery disease              | 122 (51.3)  | 38 (48.1)  | 0.627   | 0.02  | 116 (51.6)  | 116 (51.1) | 0.896   | -0.04 |
| Stroke                               | 51 (21.4)   | 10 (12.7)  | 0.087   | -0.07 | 49 (21.8)   | 59 (25.9)  | 0.309   | -0.06 |
| RAAS-blocker                         | 112 (47.1)  | 31 (39.2)  | 0.226   | -0.11 | 109 (48.4)  | 111 (48.9) | 0.926   | -0.07 |
| Beta-blocker                         | 93 (39.1)   | 29 (36.7)  | 0.708   | 0.01  | 90 (40.0)   | 70 (30.8)  | 0.042   | 0     |
| DAPT duration over 6 months          | 43 (54.4)   | 112 (47.1) | 0.256   | 0.11  | 106 (47.1)  | 99 (43.6)  | 0.458   | -0.03 |
| Body mass index (kg/m <sup>2</sup> ) | 23±3.6      | 23±4.2     | 0.493   | 0.10  | 23.2±3.6    | 22.3±0.7   | 0.493   | -0.08 |
| Hemoglobin (g/dL)                    | 12.2±2.1    | 12.3±2.1   | 0.475   | -0.07 | 12.2±2.1    | 12.1±3.7   | 0.475   | -0.17 |
| Albumin (g/dL)                       | 3.8±0.6     | 3.8±0.4    | 0.705   | 0.01  | 3.8±0.6     | 3.8±0.9    | 0.705   | 0     |
| Target LDL <70 mg/dL                 | 88 (37.4)   | 37 (46.8)  | 0.127   | -0.12 | 84 (37.3)   | 86 (37.7)  | 0.934   | 0     |
| TASC classification C or D           | 122 (51.3)  | 39 (49.4)  | 0.745   | 0.03  | 115 (51.1)  | 115 (50.6) | 0.912   | -0.04 |
| Below knee lesion                    | 72 (30.3)   | 19 (24.1)  | 0.291   | -0.04 | 67 (29.7)   | 72 (31.7)  | 0.647   | -0.06 |

DAPT, dual antiplatelet therapy; HI high-intensity; LDL, low-density lipoprotein; LMI, low-to-moderate intensity; RAAS, renin angiotensin aldosterone system; SD, standardized difference; TASC, Trans-Atlantic Inter-Society Consensus for the Management of Peripheral Arterial Disease.

Data are presented as mean±SD or n (%).
